# Supplementary material for: A social network model of COVID-19
Source: PubMed Central journal article supplement (PMC7595335; doi:10.1371/journal.pone.0240878), 2020-10-29

## S1 Appendix

**Table 1. Testing, network vs. uniform transmission**

| <i>testing rate, <math>\theta =</math></i> | NSIR (network), $p = 0$<br>change relative to no testing |           |           |            | SIR (uniform), $p = 1$<br>change relative to no testing |           |           |            |
|--------------------------------------------|----------------------------------------------------------|-----------|-----------|------------|---------------------------------------------------------|-----------|-----------|------------|
|                                            | <i>0.1%</i>                                              | <i>2%</i> | <i>5%</i> | <i>10%</i> | <i>0.1%</i>                                             | <i>2%</i> | <i>5%</i> | <i>10%</i> |
| total infected %                           | -0.3%                                                    | -5.1%     | -14%      | -30%       | -0.2%                                                   | -3.6%     | -9.9%     | -23%       |
| infection peak %                           | -0.4%                                                    | -13%      | -31%      | -56%       | -0.4%                                                   | -10%      | -25%      | -48%       |
| total deaths %                             | -3.9%                                                    | -8.3%     | -16%      | -30%       | -0.6%                                                   | -7.1%     | -9.2%     | -20%       |
| duration, days                             | -0.6%                                                    | +7.6%     | +22%      | +41%       | -0.6%                                                   | +4.1%     | +13%      | +31%       |

**Table 2. Contact tracing, network vs. uniform transmission.**

| <i>tracing rate, <math>\phi =</math></i> | NSIR (network), $p = 0$<br>change relative to no contact tracing |            |            |            | SIR (uniform), $p = 1$<br>change relative to no contact tracing |            |            |            |
|------------------------------------------|------------------------------------------------------------------|------------|------------|------------|-----------------------------------------------------------------|------------|------------|------------|
|                                          | <i>0.01</i>                                                      | <i>0.1</i> | <i>0.2</i> | <i>0.5</i> | <i>0.01</i>                                                     | <i>0.1</i> | <i>0.2</i> | <i>0.5</i> |
| total infected, %                        | -1.1%                                                            | -8.5%      | -15%       | -27%       | -0.4%                                                           | -3.8%      | -7.1%      | -13%       |
| infection peak, %                        | -2.9%                                                            | -16%       | -30%       | -51%       | -0.7%                                                           | -6.5%      | -12%       | -24%       |
| total deaths, %                          | -1.6%                                                            | -8.1%      | -11%       | -28%       | -1.9%                                                           | -5.7%      | -8.4%      | -15%       |
| duration, days                           | -2.0%                                                            | +7.5%      | +21%       | +45%       | +0.2%                                                           | +4.3%      | +10%       | +23%       |

Note: all results in this table use testing rate  $\theta = 5\%$ .

**Fig A. Role of superspreaders (single initial case, no intervention).** Notes: The dashed line corresponds to infection starting from node 21 ('average' spreader with 10 social contacts); the solid red line corresponds to infection starting from node 34 ('superspreader' with 200 contacts). The lines coincide in the SIR model ( $p = 1$ ).

**Global transmission only (SIR),  $p=1$**

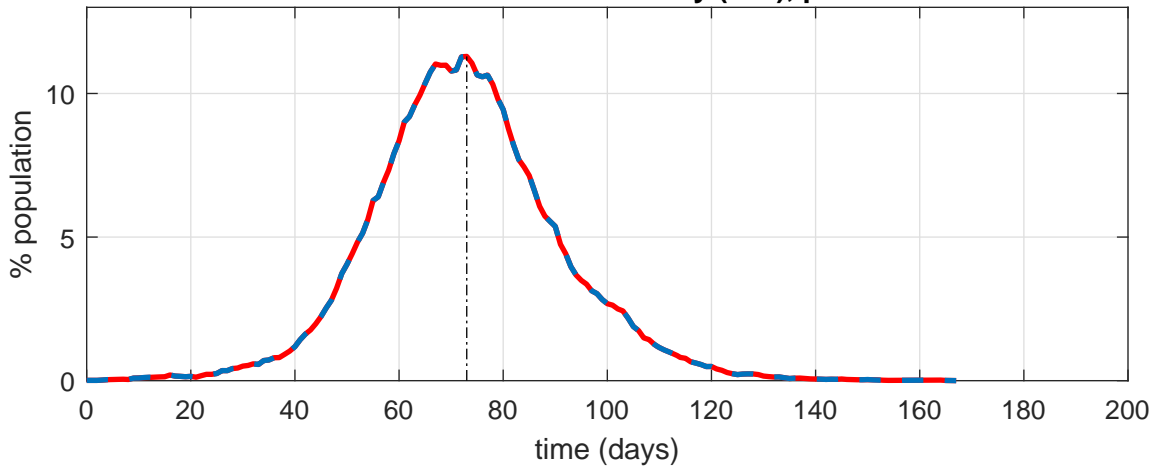

**Both global and network transmission (NSIR),  $p=0.5$**

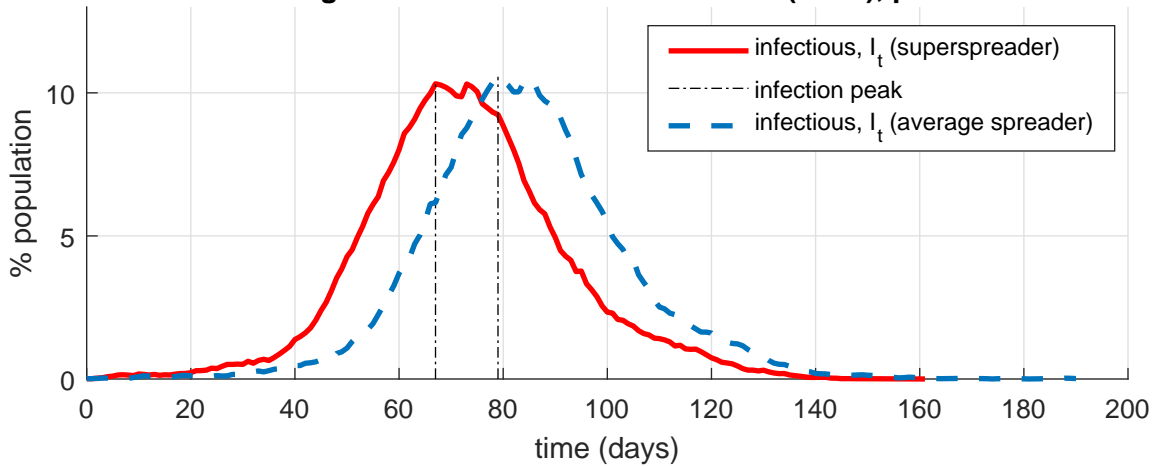

**Network transmission only (NSIR),  $p=0$**

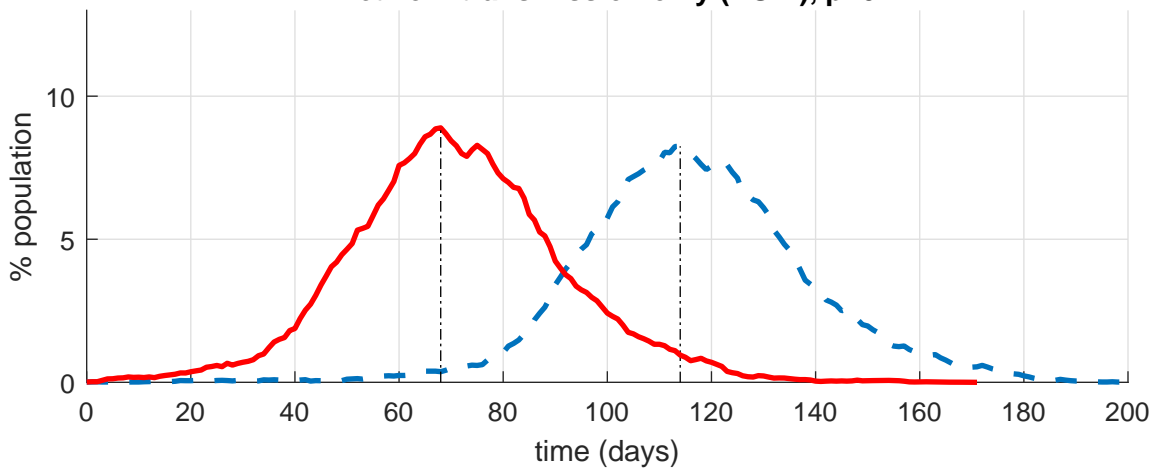

**Fig B.** Baseline graph  $G$  vs. Albert-Barabasi and Watts-Strogatz graphs.

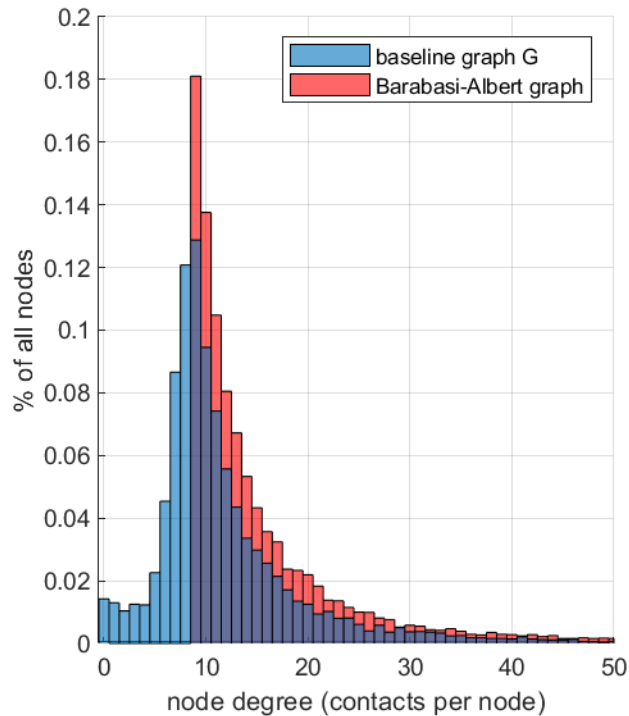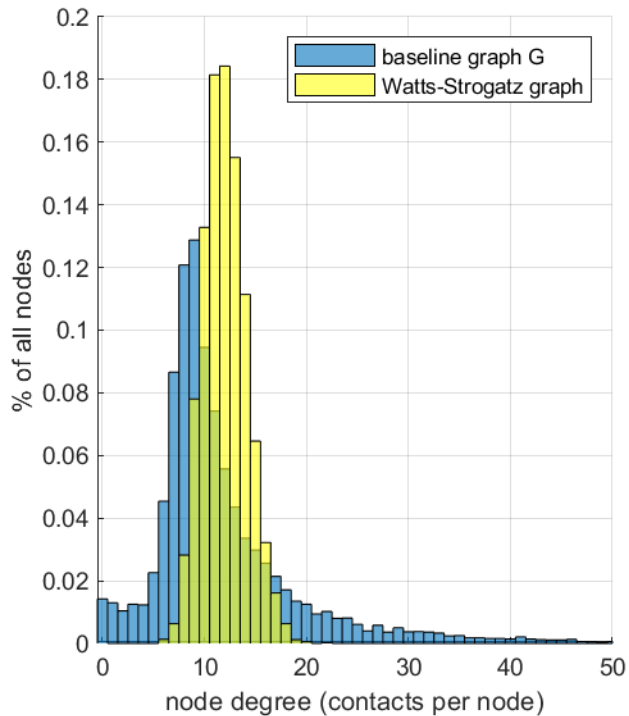

**Fig C.** Baseline graph  $G$  and close-contacts graph  $Q$ .

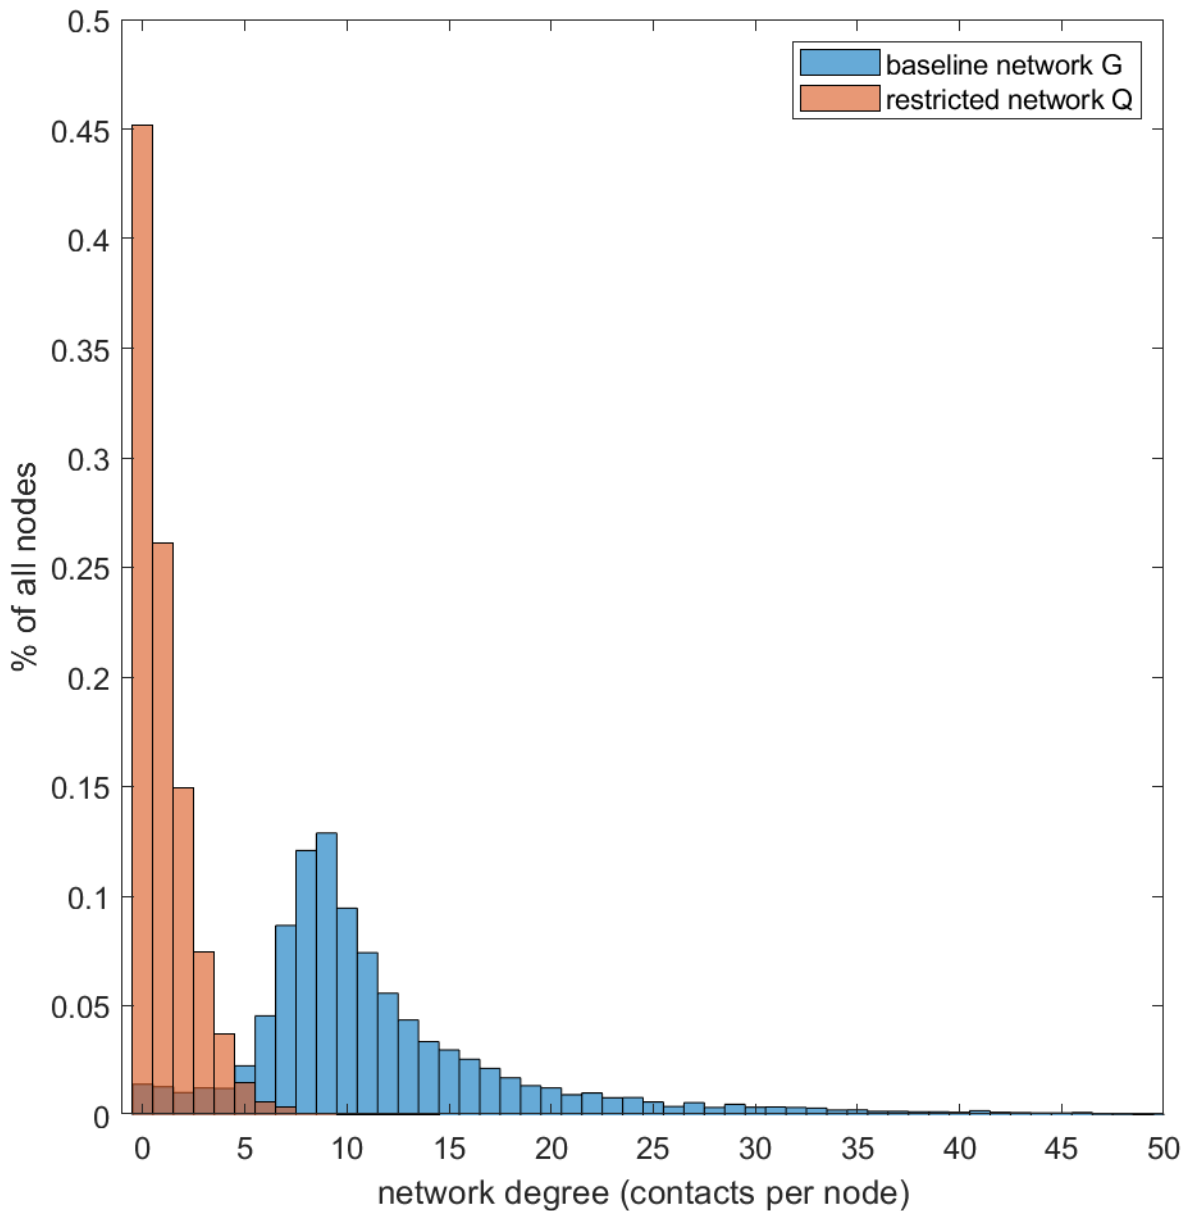

**Fig D.** Lockdown exit, mass testing and contact tracing – global transmission only,  $p = 1$ .

Infectious,  $I_t$

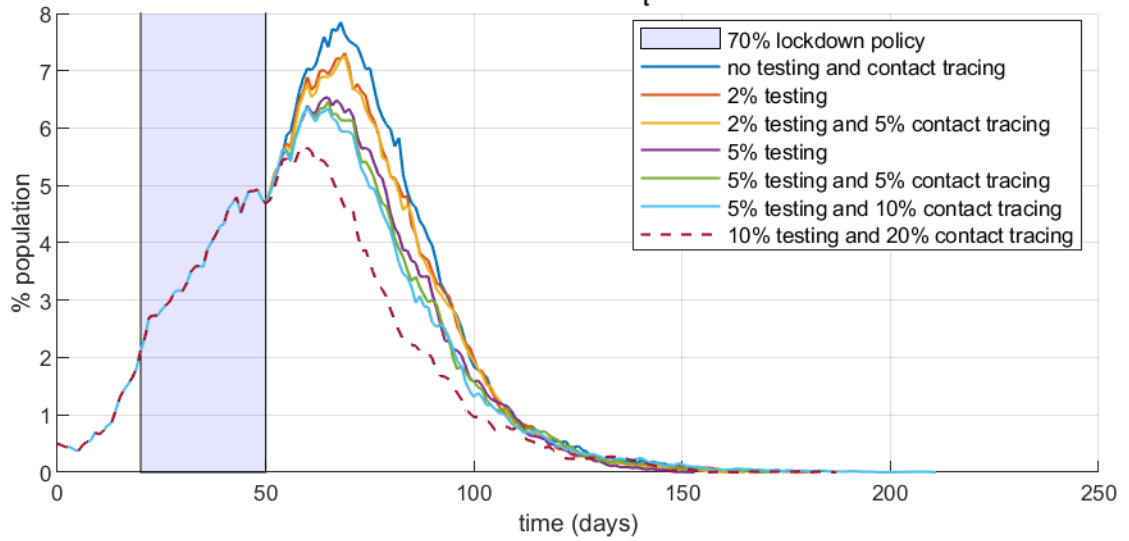

Cumulative deaths

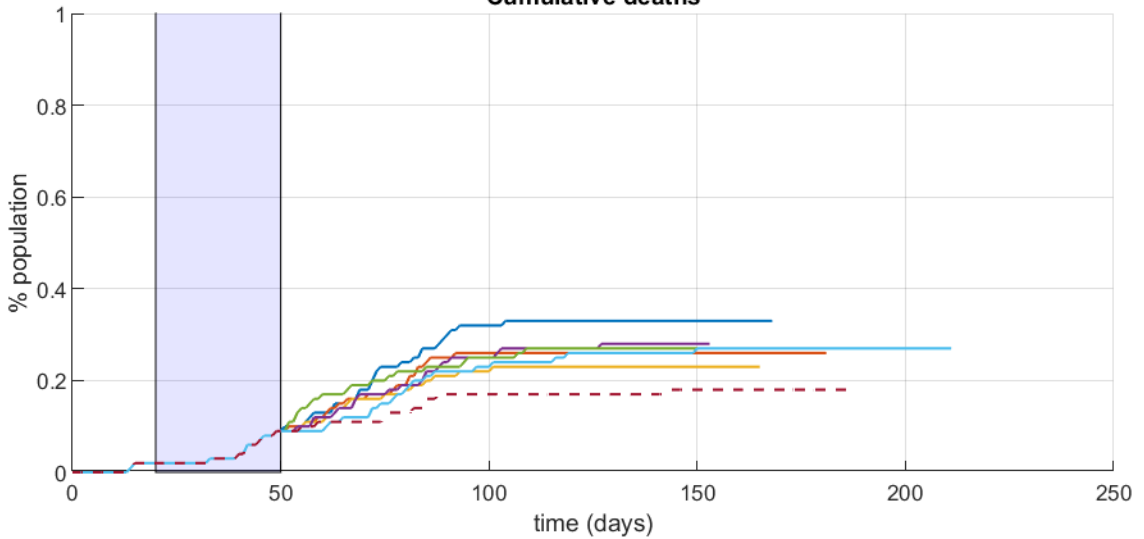



**Fig E. Network path dependency – 10 different distancing policy J simulation runs.**

Infectious,  $I_t$

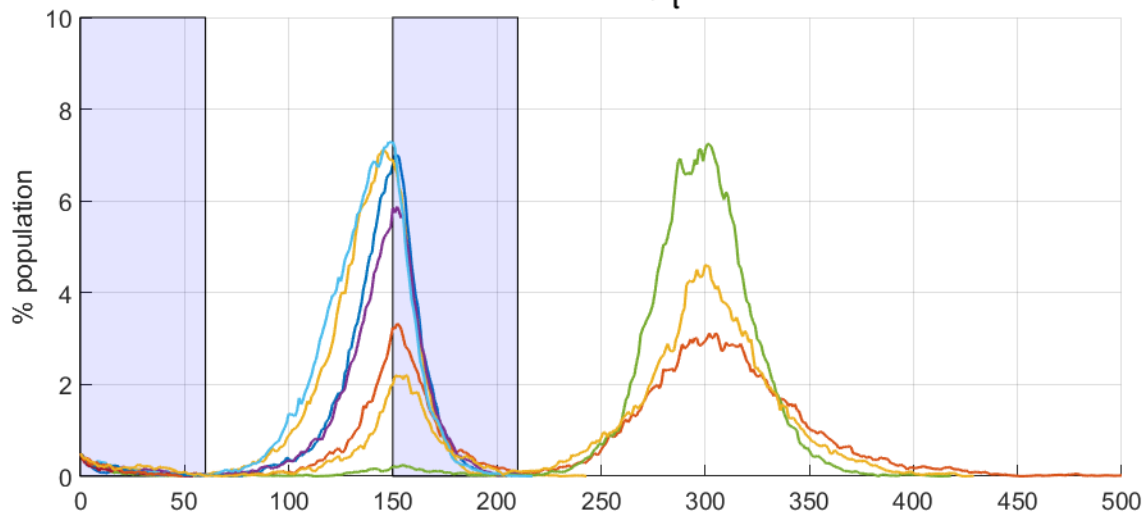

Cumulative deaths

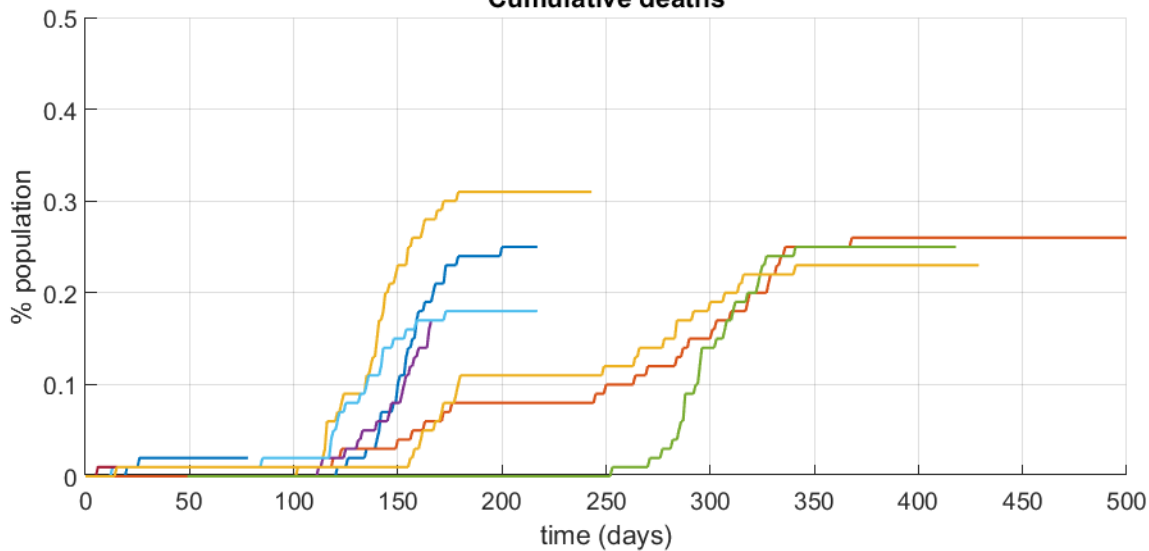

Supplement: pone.0240878.s001.pdf [file pone.0240878.s001.pdf]
